# Supplementary material
Source: HighWire-hosted journal article supplement (https://www.cmaj.ca/highwire/filestream/59551/field_highwire_adjunct_files/0/151017-image-1-at.pdf)
Supplement: 151017-image-1-at.pdf [file 151017-image-1-at.pdf]

**Appendix 1:** Erythematous lips, with oral ulcers covered with whitish exudates, in a 35-year-old man. Other symptoms included fever, bilateral conjunctivitis and mild discomfort while urinating.

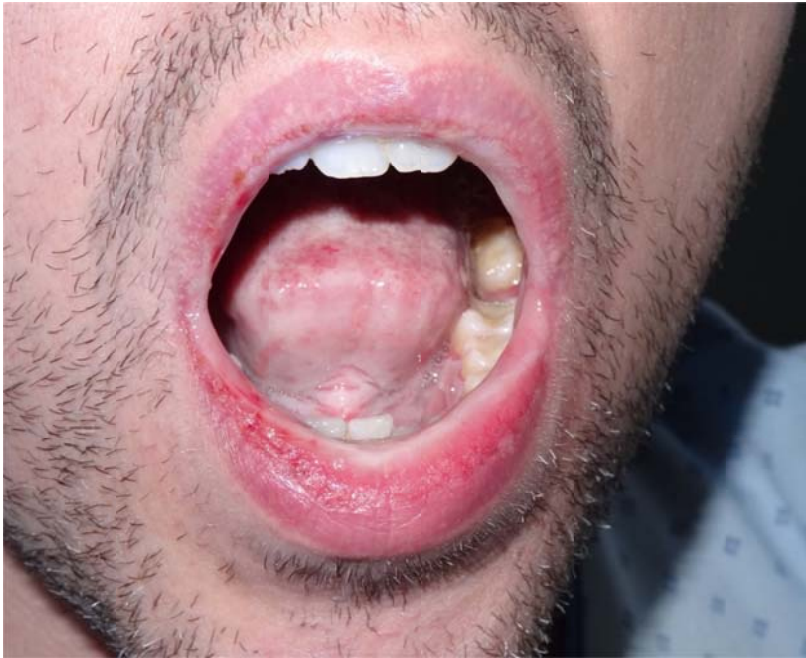

Appendix to: Alcántara-Reifs CM, Vélez García-Nieto A. *Mycoplasma pneumoniae*-associated mucositis. *CMAJ* 2016. DOI:10.1503/cmaj.151017.

Copyright © 2016 The Author(s) or their employer(s).  
To receive this resource in an accessible format, please contact us at [cmajgroup@cmaj.ca](mailto:cmajgroup@cmaj.ca).
